# Supplementary material
Source: PubMed Central journal article supplement (PMC7220160)
Supplement: mmc1.pdf [file mmc1.pdf]

# THE LANCET

## Child & Adolescent Health

### Supplementary appendix

This appendix formed part of the original submission and has been peer reviewed.  
We post it as supplied by the authors.

Supplement to: Marlais M, Wlodkowski T, Vivarelli M, et al. The severity of COVID-19 in children on immunosuppressive medication. *Lancet Child Adolesc Health* 2020; published online May 13. [https://doi.org/10.1016/S2352-4642\(20\)30145-0](https://doi.org/10.1016/S2352-4642(20)30145-0).

# Severity of COVID-19 in children on immunosuppressive medication

## Appendix

### Table showing data on the estimated incidence of COVID-19 infections in the general population and the paediatric kidney transplant population

This analysis suggests that the incidence in the paediatric kidney transplant population is similar to the background incidence of COVID-19 infections in the general population. We acknowledge that incidence data are affected by a number of potential confounders (for example unknown levels of asymptomatic carriage and testing thresholds in different settings), not all of which can be accounted for at the current time.

| Country        | General population | COVID-19 infections* | Paediatric Kidney Tx population** | Paediatric Kidney Tx COVID-19 infections | Cases per 1000 general population | Cases per 1000 paediatric kidney Tx |
|----------------|--------------------|----------------------|-----------------------------------|------------------------------------------|-----------------------------------|-------------------------------------|
| United Kingdom | 67,824,618         | 158,348              | 750                               | 2                                        | 2.3                               | 2.7                                 |
| Spain          | 46,528,966         | 229,422              | 500                               | 2                                        | 4.9                               | 4.0                                 |
| France         | 66,989,083         | 165,977              | 660                               | 2                                        | 2.5                               | 3.0                                 |
| Belgium        | 11,351,727         | 46,687               | 200                               | 1                                        | 4.1                               | 5.0                                 |
| <b>Total</b>   | <b>192,694,394</b> | <b>600,434</b>       | <b>2,110</b>                      | <b>7</b>                                 | <b>3.1</b>                        | <b>3.3</b>                          |

Tx - Transplant

\*COVID-19 infection data courtesy of Johns Hopkins University (<https://coronavirus.jhu.edu/> - date accessed 28/04/2020).

\*\*Paediatric kidney Tx figure estimates per country kindly provided by personal communication with national paediatric nephrologists.
